# Supplementary material for: Nanoscale stabilization of zintl compounds: 1D ionic Li–P double helix confined inside a carbon nanotube
Source: Royal Society of Chemistry journal article supplement (doi:10.1039/c5nr07713c), 2016-01-01
Supplement: c5nr07713c1.pdf [file c5nr07713c1.pdf]

Electronic Supplementary Information (ESI) for  
paper: “Nanoscale Stabilization of Zintl  
Compounds: 1D Ionic Li-P Double Helix Confined  
Inside a Carbon Nanotube”

Alexander S. Ivanov,<sup>\*‡</sup> Tapas Kar and Alexander I. Boldyrev

Department of Chemistry and Biochemistry, Utah State University, 0300 Old Main Hill, Logan,  
Utah 84322, United States

**Corresponding Author**

\*E-mail: [ivanova@ornl.gov](mailto:ivanova@ornl.gov) (A.S.I.)

**Present Address**

<sup>‡</sup>Oak Ridge National Laboratory, Chemical Sciences Division, 1 Bethel Valley Rd., Oak Ridge,  
Tennessee, 37831-6119, United States

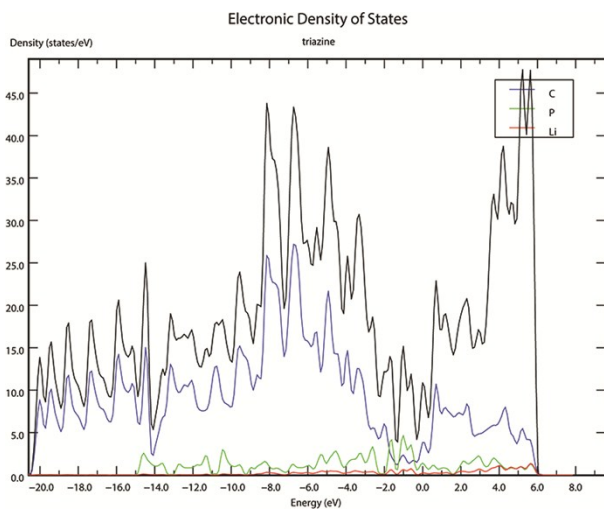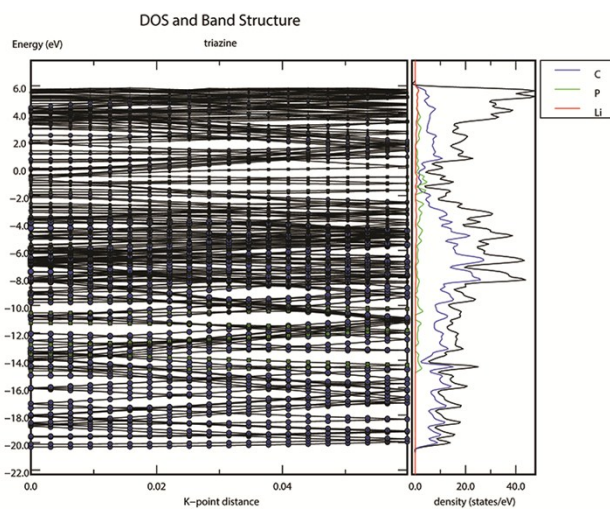

Fig. S1. Projected density of states (DOS) and band structure for LiP@SWCNT(10,0).

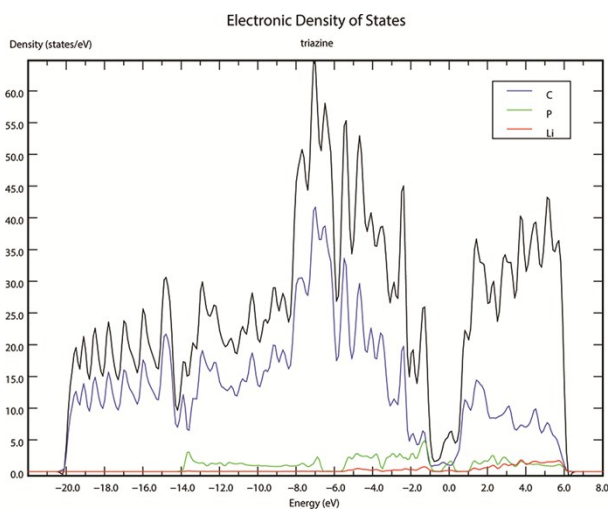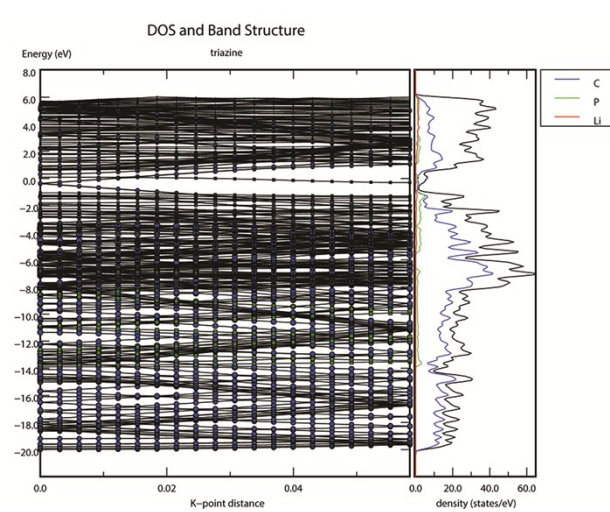

Fig. S2. Projected density of states (DOS) and band structure for LiP@SWCNT(15,0).

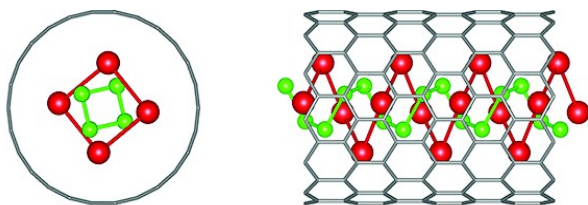

LiP@SWCNT(13,0)

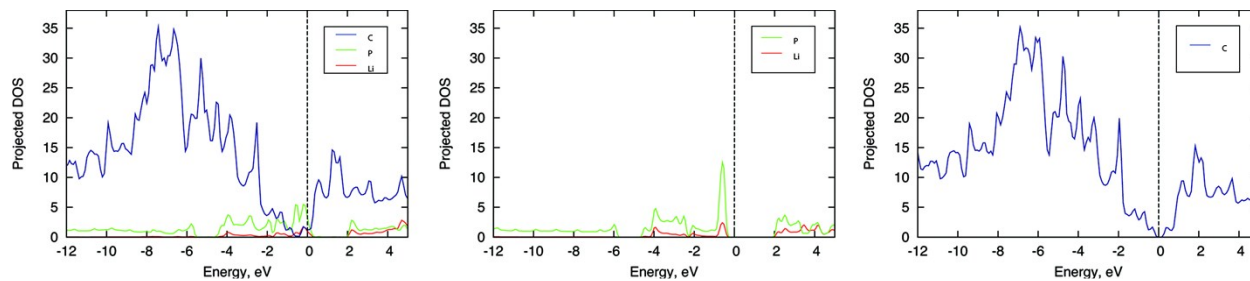

Fig. S3. End-on and side views of the fully optimized structure of LiP@SWCNT(13,0) nanocomposite as well as projected density of electronic states for the LiP@SWCNT(13,0) system (left), for the stand-alone LiP double-helical chain (center), and the carbon nanotube (right).

Table S1. P-P, Li-P, and Li-Li bond lengths (Å) in the corresponding compounds.

| Compound                                                                 | P-P bond length, Å | Li-P bond length, Å | Li-Li bond length, Å |
|--------------------------------------------------------------------------|--------------------|---------------------|----------------------|
| <b>LiP@SWCNT(12,0)<sup>a</sup></b>                                       | 2.19               | 3.69-3.70           | 3.49-3.59            |
| <b>Free standing LiP<sup>a</sup></b>                                     | 2.27               | 3.15                | 2.81                 |
| <b>P<sub>2</sub>/c LiP [lithium phosphide]<sup>b</sup></b>               | 2.20-2.22          | 3.36-3.39           | 2.97-3.01            |
| <b>P<sub>2</sub>/c BaP<sub>2</sub> [barium phosphide]<sup>c</sup></b>    | 2.20-2.25          | -                   | -                    |
| <b>P<sub>2</sub>/c SrP<sub>2</sub> [strontium phosphide]<sup>c</sup></b> | 2.20-2.25          | -                   | -                    |
| <b>Im-3m Li [lithium metal]<sup>d</sup></b>                              | -                  | -                   | 3.04                 |

<sup>a</sup>Theoretically calculated structures obtained in this work. <sup>b</sup>Experimental structure [Hönle, W.; von Schnering, H.-G. *Kristallogr.* 1981, 155, 307–314]. <sup>c</sup>Experimental structures [Dolyniuk, J.-A.; He, H.; Ivanov, A. S.; Boldyrev, A. I.; Bobev, S.; Kovnir, K. *Inorg. Chem.* 2015, 54, 8608–8616]. <sup>d</sup>The closet Li-Li separation distance in the most stable form for lithium metal at 298 K [M. R. Nadler, C. P. Kempfer, *Anal. Chem.* 1959, 31, 2109]

Table S2. Calculated Bader charges for LiP@SWCNT(10,0)

|    |         |
|----|---------|
| Li | 0.7983  |
| Li | 0.7983  |
| Li | 0.8086  |
| Li | 0.8086  |
| Li | 0.8093  |
| Li | 0.8093  |
| Li | 0.7983  |
| Li | 0.7983  |
| P  | -0.3037 |

|   |         |
|---|---------|
| P | -0.3037 |
| P | -0.645  |
| P | -0.645  |
| P | -0.6547 |
| P | -0.6547 |
| P | -0.2959 |
| P | -0.2959 |
| C | -0.0734 |
| C | -0.0734 |
| C | 0.0115  |
| C | 0.0115  |
| C | -0.1144 |
| C | -0.1144 |
| C | 0.0069  |
| C | 0.0069  |
| C | -0.1014 |
| C | -0.1014 |
| C | 0.0206  |
| C | 0.0206  |
| C | -0.1319 |
| C | -0.1319 |
| C | 0.0438  |
| C | 0.0438  |
| C | -0.1176 |
| C | -0.1176 |
| C | 0.0525  |
| C | 0.0525  |
| C | -0.1475 |
| C | -0.1475 |
| C | 0.0484  |
| C | 0.0484  |
| C | -0.1129 |
| C | -0.1129 |
| C | 0.0521  |
| C | 0.0521  |
| C | -0.0739 |
| C | -0.0739 |
| C | 0.0747  |
| C | 0.0747  |
| C | -0.0893 |
| C | -0.0893 |
| C | 0.022   |
| C | 0.022   |
| C | -0.1082 |

|   |         |
|---|---------|
| C | -0.1082 |
| C | -0.1458 |
| C | -0.1458 |
| C | -0.0939 |
| C | -0.0939 |
| C | 0.0667  |
| C | 0.0667  |
| C | -0.1229 |
| C | -0.1229 |
| C | 0.0505  |
| C | 0.0505  |
| C | -0.0806 |
| C | -0.0806 |
| C | -0.0064 |
| C | -0.0064 |
| C | -0.073  |
| C | -0.073  |
| C | 0.052   |
| C | 0.052   |
| C | -0.076  |
| C | -0.076  |
| C | -0.0189 |
| C | -0.0189 |
| C | -0.0925 |
| C | -0.0925 |
| C | -0.0004 |
| C | -0.0004 |
| C | -0.0727 |
| C | -0.0726 |
| C | 0.0562  |
| C | 0.0562  |
| C | -0.0616 |
| C | -0.0616 |
| C | 0.0709  |
| C | 0.0709  |
| C | -0.1362 |
| C | -0.1362 |
| C | 0.0316  |
| C | 0.0316  |
| C | 0.0063  |
| C | 0.0063  |
| C | 0.0694  |
| C | 0.0694  |

Table S3. Calculated Bader charges for LiP@SWCNT(15,0)

|    |         |
|----|---------|
| Li | 0.8437  |
| Li | 0.8543  |
| Li | 0.8477  |
| Li | 0.8558  |
| Li | 0.8375  |
| Li | 0.8488  |
| Li | 0.8422  |
| Li | 0.8369  |
| P  | -0.554  |
| P  | -0.7574 |
| P  | -0.6836 |
| P  | -0.5177 |
| P  | -0.6042 |
| P  | -0.7198 |
| P  | -0.6216 |
| P  | -0.7955 |
| C  | 0.0127  |
| C  | 0.0482  |
| C  | -0.0252 |
| C  | -0.0671 |
| C  | 0.0696  |
| C  | 0.0711  |
| C  | -0.0689 |
| C  | -0.0789 |
| C  | 0.0116  |
| C  | 0.0295  |
| C  | -0.0779 |
| C  | -0.0752 |
| C  | 0.0259  |
| C  | 0.0206  |
| C  | -0.0729 |
| C  | -0.0651 |
| C  | 0.0795  |
| C  | 0.0869  |
| C  | -0.0868 |
| C  | -0.1059 |
| C  | 0.0532  |
| C  | 0.0496  |
| C  | 0.0776  |
| C  | -0.0955 |

|   |         |
|---|---------|
| C | 0.0607  |
| C | 0.0645  |
| C | 0.069   |
| C | -0.079  |
| C | 0.0574  |
| C | 0.056   |
| C | -0.0898 |
| C | -0.1038 |
| C | 0.04    |
| C | 0.0142  |
| C | -0.1184 |
| C | -0.1341 |
| C | 0.0442  |
| C | 0.0492  |
| C | -0.0593 |
| C | -0.0589 |
| C | 0.0666  |
| C | 0.0687  |
| C | -0.0669 |
| C | -0.0694 |
| C | 0.0449  |
| C | 0.0458  |
| C | -0.0542 |
| C | -0.0559 |
| C | 0.0449  |
| C | 0.0457  |
| C | -0.0677 |
| C | -0.0687 |
| C | 0.0602  |
| C | 0.0605  |
| C | -0.0311 |
| C | -0.033  |
| C | -0.003  |
| C | -0.0025 |
| C | -0.0083 |
| C | -0.01   |
| C | 0.0657  |
| C | 0.0694  |
| C | -0.0718 |
| C | -0.0748 |
| C | 0.0498  |
| C | 0.0411  |
| C | -0.0975 |
| C | -0.1216 |



|   |         |
|---|---------|
| C | 0.0286  |
| C | 0.0361  |
| C | -0.1391 |
| C | -0.1159 |
| C | 0.0504  |
| C | 0.0658  |
| C | -0.0705 |
| C | -0.0668 |
| C | 0.0738  |
| C | 0.0276  |
| C | -0.1033 |
| C | -0.09   |
| C | -0.1167 |
| C | 0.0418  |
| C | -0.1106 |
| C | -0.076  |
| C | -0.0944 |
| C | 0.0621  |
| C | -0.0955 |
| C | -0.059  |
| C | 0.0648  |
| C | 0.0258  |
| C | -0.092  |
| C | -0.0845 |
| C | 0.0581  |
| C | 0.0433  |
| C | -0.0727 |
| C | -0.0715 |
| C | 0.0378  |
| C | 0.0363  |
| C | -0.057  |
| C | -0.0589 |
| C | 0.0742  |
| C | 0.0244  |
| C | -0.0367 |
| C | 0.0101  |
| C | 0.0296  |
| C | 0.0276  |
| C | -0.0733 |
| C | -0.0738 |
| C | 0.0419  |
| C | 0.0401  |
| C | -0.052  |
| C | -0.0522 |

|   |         |
|---|---------|
| C | 0.0412  |
| C | 0.0386  |
| C | -0.0315 |
| C | -0.0319 |
| C | 0.0237  |
| C | 0.022   |
| C | -0.0353 |
| C | -0.0334 |
